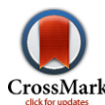

## Correction

# Correction: Unraveling Patterns of Site-to-Site Synonymous Rates Variation and Associated Gene Properties of Protein Domains and Families

The *PLOS ONE* Staff

## Notice of Republication

This article was republished on June 18, 2014, to replace Figure 3, which was an accidental duplication of Figure 2. Please download this article again to view the correct version. The originally published, uncorrected article and the republished, corrected article are provided here for reference.

## Supporting Information

**File S1.** Originally published, uncorrected article.  
(PDF)

**File S2.** Republished, corrected article.  
(PDF)

## Reference

1. Dimitrieva S, Anisimova M (2014) Unraveling Patterns of Site-to-Site Synonymous Rates Variation and Associated Gene Properties of Protein Domains and Families. *PLoS ONE* 9(6): e95034. doi:10.1371/journal.pone.0095034

**Citation:** The *PLOS ONE* Staff (2014) Correction: Unraveling Patterns of Site-to-Site Synonymous Rates Variation and Associated Gene Properties of Protein Domains and Families. *PLoS ONE* 9(7): e102721. doi:10.1371/journal.pone.0102721

**Published** July 8, 2014

**Copyright:** © 2014 The *PLOS ONE* Staff. This is an open-access article distributed under the terms of the Creative Commons Attribution License, which permits unrestricted use, distribution, and reproduction in any medium, provided the original author and source are credited.
